# Supplementary material for: Topo IV is the topoisomerase that knots and unknots sister duplexes during DNA replication
Source: PubMed Central journal article supplement — Nucleic Acids Res. 2011 Dec 19;40(8):3563–73. doi: 10.1093/nar/gkr1237 (PMC3333868; doi:10.1093/nar/gkr1237), 2011-12-19
Supplement: supp_gkr1237_nar-02553-d-2011-File010.pdf [file supp_gkr1237_nar-02553-d-2011-File010.pdf]

**TABLE I*****E. coli* strains**

| <b>Strain</b> | <b>Relevant genotype</b>                                                                                                                                                                                                                                                           |
|---------------|------------------------------------------------------------------------------------------------------------------------------------------------------------------------------------------------------------------------------------------------------------------------------------|
| W3310         | F <sup>-</sup>                                                                                                                                                                                                                                                                     |
| parE10        | W3110 except [ <i>parE10 recA</i> ]                                                                                                                                                                                                                                                |
| AB1157        | F <sup>-</sup> <i>thr-1 araC14 leuB6</i> (Am) $\Delta$ ( <i>gpt-proA</i> )62 <i>lacY1 tsx-33, qsr'-0 glnV44</i> (AS) <i>galK2</i> (Oc) $\lambda^-$ <i>Rac-0 hisG4</i> (Oc) <i>rfbC1 mgl-51 rpoS396</i> (Am) <i>rpsL31</i> (strR) <i>kdgK51 xylA5 mtl-1 argE3</i> (Oc) <i>thi-1</i> |
| DS9038        | AB1157 except [ <i>recF143 lacI<sup>q</sup> lacZ</i> $\Delta$ M15 <i>xerC::gen</i> ]                                                                                                                                                                                               |
| DS9039        | AB1157 except [ <i>recF143 lacI<sup>q</sup> lacZ</i> $\Delta$ M15 <i>xerD::kan</i> ]                                                                                                                                                                                               |
